# Supplementary material for: Hollow particles are produced by the burying of sulfate end-groups inside particles prepared by emulsion polymerization of styrene with potassium persulfate as initiator in the absence/presence of a nonionic emulsifier
Source: Royal Society of Chemistry journal article supplement (doi:10.1039/c7py01608e), 2017-01-01
Supplement: c7py01608e1.pdf [file c7py01608e1.pdf]

Electronic Supplementary Material (ESI) for Polymer Chemistry.  
This journal is © The Royal Society of Chemistry 2017

*Supporting Information for:*

**Hollow Particles are Produced by the Burying of Sulfate End-Groups  
Inside Particles Prepared by Emulsion Polymerization of Styrene with  
Potassium Persulfate as Initiator in the Absence/Presence of Nonionic  
Emulsifier**

Chujuan Huang<sup>a</sup>, Hiroshi Kobayashi<sup>b</sup>, Mineho Moritaka<sup>b</sup> and Masayoshi

Okubo<sup>\*ab</sup>,

<sup>a</sup> *Institute of Advanced Materials (IAM) of Nanjing Tech University, 5 Ximofan Road,  
Nanjing 210009, China*

<sup>b</sup> *Graduate School of Engineering, Kobe University, Kobe 657-8501, Japan*

E-mail: okubo@kobe-u.ac.jp

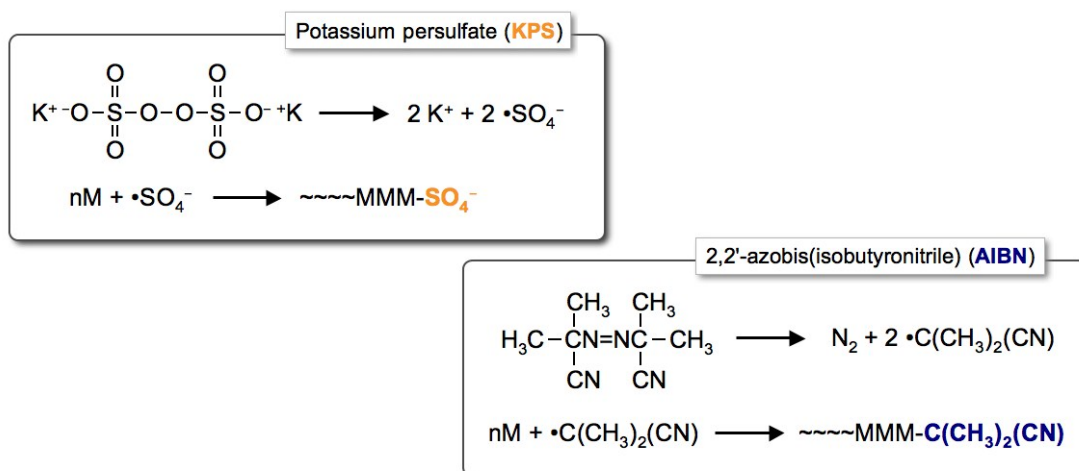

**Scheme S1.** Sulfate end isobutyronitrile end-groups derived from, respectively, KPS and AIBN.

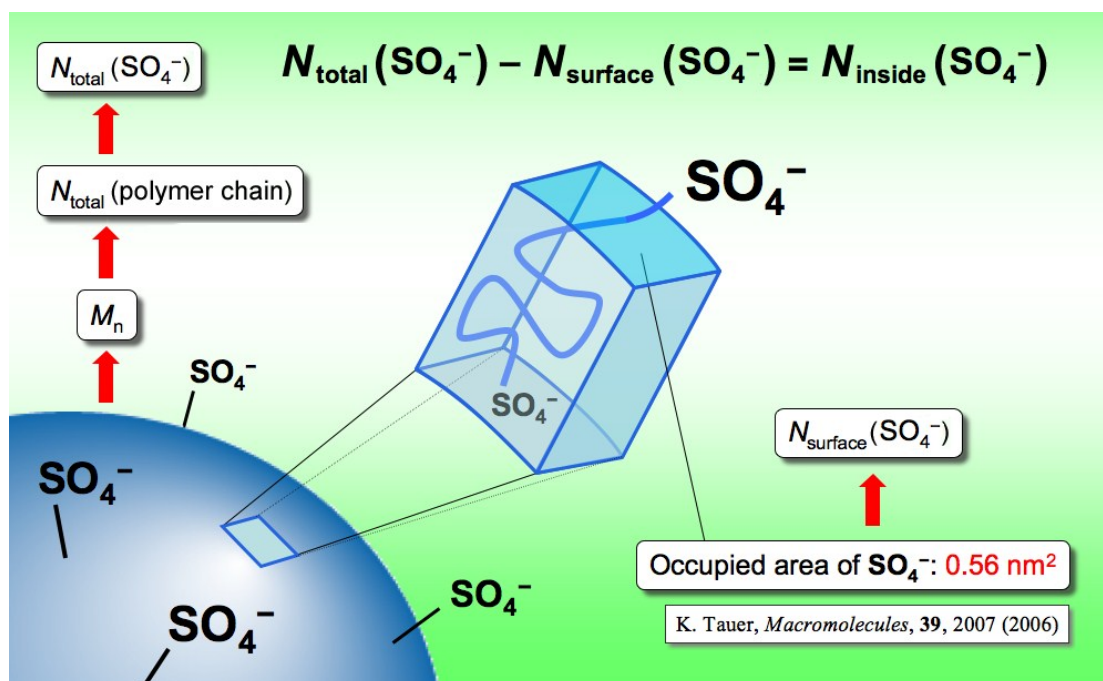

**Scheme S2.** Calculation of sulfate end-group concentration buried inside of particle. Abbreviations:  $N_{\text{total}}(\text{SO}_4^-)$ , total number of  $\text{SO}_4^-$  per particle;  $N_{\text{surface}}(\text{SO}_4^-)$ , number of  $\text{SO}_4^-$  on particle surface;  $N_{\text{inside}}(\text{SO}_4^-)$ , number of  $\text{SO}_4^-$  inside of particle;  $M_n$ , number-average molecular weight;  $N_{\text{total}}(\text{polymer chain})$ , number of polymer chains per particle.
